# Supplementary material for: Clinical features and prognosis of acute-on-chronic liver failure in patients with recompensated cirrhosis
Source: PubMed Central journal article supplement (PMC10510206; doi:10.1186/s12876-023-02956-4), 2023-09-19
Supplement: 12876_2023_2956_MOESM1_ESM.pdf [file 12876_2023_2956_MOESM1_ESM.pdf]

**Table S1 Comparison of baseline characteristics among three groups of ACLF patients**

| <b>Characteristic</b>        | <b>Compensated<br/>group (n=226)</b> | <b>Recompensated<br/>group (n=73)</b> | <b>Decompensated<br/>group (n=162)</b> | <b>Value</b>            | <b>P</b> |
|------------------------------|--------------------------------------|---------------------------------------|----------------------------------------|-------------------------|----------|
| Age (years)                  | 52.1 ± 11.9                          | 53.2 ± 8.9                            | 53.9 ± 9.9                             | F= 1.301                | 0.274    |
| Male (n,%)                   | 182(80.5%)                           | 60(82.1%)                             | 134(82.7%)                             | X <sup>2</sup> =0.322   | 0.851    |
| Etiology                     |                                      |                                       |                                        |                         |          |
| HBV (n,%)                    | 123(54.4%)                           | 28(38.4%)                             | 76(46.9%)                              | X <sup>2</sup> =6.241   | 0.044    |
| Alcohol (n,%)                | 82(36.3%)                            | 30(41.1%)                             | 72(44.4%)                              | X <sup>2</sup> 2=.671   | 0.263    |
| Other causes<br>(n,%)        | 21(9.3%)                             | 15(20.5%)                             | 14(8.6%)                               | X <sup>2</sup> =8.484   | 0.014    |
| Precipitating events         |                                      |                                       |                                        |                         |          |
| Bacterial infection<br>(n,%) | 103 (45.6%)                          | 28 (38.4%)                            | 97 (59.9%)                             | X <sup>2</sup> = 11.997 | 0.002    |
| esophagogastric              |                                      |                                       |                                        |                         |          |
| variceal bleeding<br>(n,%)   | 46 (20.4%)                           | 20 (27.4%)                            | 40 (24.7%)                             | X <sup>2</sup> = 1.953  | 0.377    |
| HBV reactivation             |                                      |                                       |                                        |                         |          |
| (n,%)                        | 25 (11.1%)                           | 10 (13.7%)                            | 14 (8.6%)                              | X <sup>2</sup> = 1.442  | 0.486    |
| Other                        |                                      |                                       |                                        |                         |          |
| precipitating<br>event       | 15 (6.6%)                            | 4 (5.5%)                              | 5 (3.1%)                               | X <sup>2</sup> 2=.424   | 0.298    |

---

(trauma/surgery/d

rinking,etc.)

(n,%)

No precipitating

67 (29.6%)

15 (20.5%)

22 (13.6%)

$\chi^2=14.142$

0.001

event (n,%)

More than one

precipitating

30 (13.3%)

4 (5.5%)

17 (10.5%)

$\chi^2=3.490$

0.175

event (n,%)

Laboratory data

WBC ( $\times 10^9/L$ )

7.5(5.1~11.2)

6.9(4.2~9.4)

8.5 (5.5~12.9)

H=7.484

0.024

Hb (g/L)

111.9 $\pm$ 28.1

109.3 $\pm$ 23.9

99.9 $\pm$ 24.2

F=10.104

<0.001

PLT ( $\times 10^9/L$ )

77.0(55.0~107.8)

58.0(38.0~87.0)

62.0(40.3~91.0)

H=15.127

0.001

TP (g/L)

89.3 $\pm$ 11.6

84.9 $\pm$ 11.0

81.4 $\pm$ 16.4

F=6.467

0.002

ALB (g/L)

28.2 $\pm$ 4.9

28.3 $\pm$ 4.5

26.6 $\pm$ 4.3

F=7.005

0.001

TBil ( $\mu\text{mol/L}$ )

313.2(228.6~399.8)

223.1(127.8~341.1)

188.4(119.0~318.8)

H=56.430

<0.01

ALT (U/L)

96.5(36.0~364.0)

46.0(24.0~277.0)

43.0(24.0~136.8)

H=15.771

<0.001

AST (U/L)

154.5(77.0~359.5)

89.0(52.0~296.0)

81.0(44.5~172.8)

H=20.299

<0.001

ALP (U/L)

132.5(99.0~176.3)

120.0(98.0~186.0)

109.5(76.0~153.0)

H=10.091

0.006

CHE (U/L)

2197.5

2028.0

1852.0

H=15.204

<0.001

(1559.5~3030.3)

(1592.0~2594.0)

(1260.5~2405.8)

INR

2.6(2.1~3.6)

2.5(1.9~3.0)

3.0(2.4~3.9)

H=16.383

<0.001

Cr ( $\mu\text{mol/L}$ )

93.9(59.0~198.0)

105.0(65.0~156.0)

136.5(79.8~253.3)

H=13.978

0.001

---

|             |                      |                       |                      |           |        |
|-------------|----------------------|-----------------------|----------------------|-----------|--------|
| Na (mmol/L) | 133.3( 129.5~ 137.5) | 133.7( 130.4~ 136. 1) | 131.0( 126.5~ 134.6) | H= 15.916 | <0.001 |
|-------------|----------------------|-----------------------|----------------------|-----------|--------|

---

ALB, albumin; ALP, alkaline phosphatase; ALT, alanine aminotransferase; AST, aspartate aminotransferase; CHE, cholinesterase; Cr, creatinine; Hb, hemoglobin; INR, international normalized ratio; Na, serum sodium; PLT, platelet; TBil, total bilirubin; TP, total protein; WBC, white blood cell.
