# Supplementary material for: Clinical features and prognosis of acute-on-chronic liver failure in patients with recompensated cirrhosis
Source: PubMed Central journal article supplement (PMC10510206; doi:10.1186/s12876-023-02956-4), 2023-09-19
Supplement: 12876_2023_2956_MOESM2_ESM.pdf [file 12876_2023_2956_MOESM2_ESM.pdf]

**Table S2 Comparison of hemoglobin in three groups of patients with ACLF precipitated by esophagogastric variceal bleeding**

| Characteristic | Compensated<br>group<br>(n=46) | Recompensated<br>group<br>(n=20) | Decompensated<br>group<br>(n=40) | Value | <i>P</i> |
|----------------|--------------------------------|----------------------------------|----------------------------------|-------|----------|
| Hb (g/L)       | 89.9±33.1                      | 90.3±23.2                        | 83.5±22.8                        | 0.692 | 0.503    |

ACLF, acute-on-chronic liver failure; Hb, hemoglobin
